# Supplementary material for: One-pot synthesis of micron-sized polybetaine particles; innovative use of supercritical carbon dioxide
Source: Royal Society of Chemistry journal article supplement (doi:10.1039/c7py00455a), 2017-01-01

**Supporting information for: One-pot synthesis of micron-sized polybetaine particles; innovative use of supercritical carbon dioxide**

Simon P. Bassett, Natasha A. Birkin, James Jennings, Emma Chapman, Rachel K. O'Reilly, Steven M. Howdle, Helen Willcock

|                                                                                                                                                                                                                                                                                          |   |
|------------------------------------------------------------------------------------------------------------------------------------------------------------------------------------------------------------------------------------------------------------------------------------------|---|
| S1 – Overview of conditions attempted for inverse emulsion polymerisations.....                                                                                                                                                                                                          | 2 |
| S2 - Images of destabilised inverse emulsion after polymerisation (top left), dispersion of product in water rather than oil phase (top right) and wetting of polymer by the oil phase (right), SEM image of “best” irregular particles formed in EMUL 8 (scale bar 200 nm, bottom)..... | 3 |
| S3 - Overview of conditions used for dispersion polymerisations.....                                                                                                                                                                                                                     | 4 |
| S4 – Image of water swollen gel formed when scCO <sub>2</sub> /water inverse-emulsion system was attempted showing issues with this method.....                                                                                                                                          | 5 |
| S5 – Image of redispersions of particles with varying crosslinker densities (left to right) – 6 (10 wt%), 5 (5 wt%), 4 (2.5 wt%), 3 (1 wt%), 2 (0.5 wt%). .....                                                                                                                          | 5 |
| S6 – SEM images of particles formed with 10wt% MBAC (left) and PEGDMA (right) as crosslinker in the place of EGDMA. ....                                                                                                                                                                 | 5 |
| S7 - Effect of varying the concentration of initiator in the polymerisation of DMAPS in scCO <sub>2</sub> . ....                                                                                                                                                                         | 6 |
| S8 - Effect of varying the concentration of initiator (1-10 wt% with respect to monomer – samples Init 1 – Init 10 in table S7) in the polymerisation of DMAPS in scCO <sub>2</sub> . ....                                                                                               | 7 |
| S9 – Broad PSD of Sample 11 dispersed in water with SDS, d(0.5)volume = 2.85 μm.....                                                                                                                                                                                                     | 7 |
| S10 - SEM images of cast film of particles, sample 6 – Table 1 (scale bar 20 μm left, 1 μm right).....                                                                                                                                                                                   | 8 |

**S1 – Overview of conditions attempted for inverse emulsion polymerisations**

| Sample # | Conditions                |                               |                                  |                                   |                                    |                             | Observations<br>Particle size (nm)<br><i>DLS, SEM</i>                  |
|----------|---------------------------|-------------------------------|----------------------------------|-----------------------------------|------------------------------------|-----------------------------|------------------------------------------------------------------------|
|          | Monomer (wt% of aq phase) | Crosslinker (wt% of aq phase) | Aq phase (wt% of total emulsion) | Oil phase (wt% of total emulsion) | Surfactant (wt% of total emulsion) | Initiator (wt% wrt monomer) |                                                                        |
| EMUL 1   | DMAPS (9.5)               | PEGDMA (0.5)                  | 0.5M NaCl (20)                   | Toluene (80)                      | TWEEN 80 (2.5)                     | ACVA (0.1)                  | Separated after heating 35                                             |
| EMUL 2   | DMAPS (41.3)              | PEGDMA (2.2)                  | 0.5M NaCl (5.5)                  | Toluene (94.5)                    | TWEEN 80 (2.5)                     | ACVA (0.1)                  | No emulsion formed<br>Higher surfactant concentration required         |
| EMUL 3   | DMAPS (21.9)              | PEGDMA (1.1)                  | 0.5M NaCl (10)                   | Cyclohexane (90)                  | TWEEN 80 (0.5)                     | ACVA (0.1)                  | Separated before heating                                               |
| EMUL 4   | DMAPS (21.9)              | PEGDMA (1.1)                  | 0.5M NaCl (10)                   | Cyclohexane (90)                  | TWEEN 80 (2)                       | ACVA (0.1)                  | Separated after heating                                                |
| EMUL 5   | DMAPS (21.9)              | PEGDMA (1.1)                  | 0.5M NaCl (10)                   | Cyclohexane (90)                  | TWEEN 80 (0.5)                     | AIBN (0.1)                  | Separated before heating                                               |
| EMUL 6   | DMAPS (21.9)              | PEGDMA (1.1)                  | 0.5M NaCl (10)                   | Cyclohexane (90)                  | TWEEN 80 (2)                       | AIBN (0.1)                  | Separated after heating                                                |
| EMUL 7   | DMAPS (21.9)              | PEGDMA (1.1)                  | 0.9mM NaCl (10)                  | Cyclohexane (90)                  | TWEEN 80 (8)                       | ACVA (0.1)                  | Gel formed before polymerisation.<br>Surfactant concentration too high |
| EMUL 8   | DMAPS (21.9)              | PEGDMA (1.1)                  | Pure water (10)                  | Toluene                           | TWEEN 80 (2.5)                     | ACVA (0.1)                  | Emulsion reversed<br><i>Erratic data – 150-220, 70-155</i>             |
| EMUL 9   | DMAPS (21.9)              | PEGDMA (1.1)                  | Pure water (10)                  | Toluene                           | TWEEN 80 (4)                       | ACVA (0.1)                  | Emulsion reversed                                                      |
| EMUL 10  | DMAPS (21.9)              | PEGDMA (1.1)                  | Pure water (10)                  | Toluene                           | TWEEN 80 (3)                       | ACVA (0.1)                  | Emulsion reversed                                                      |

S2 - Images of destabilised inverse emulsion after polymerisation (top left), dispersion of product in water rather than oil phase (top right) and wetting of polymer by the oil phase (right), SEM image of "best" irregular particles formed in EMUL 8 (scale bar 200 nm, bottom).

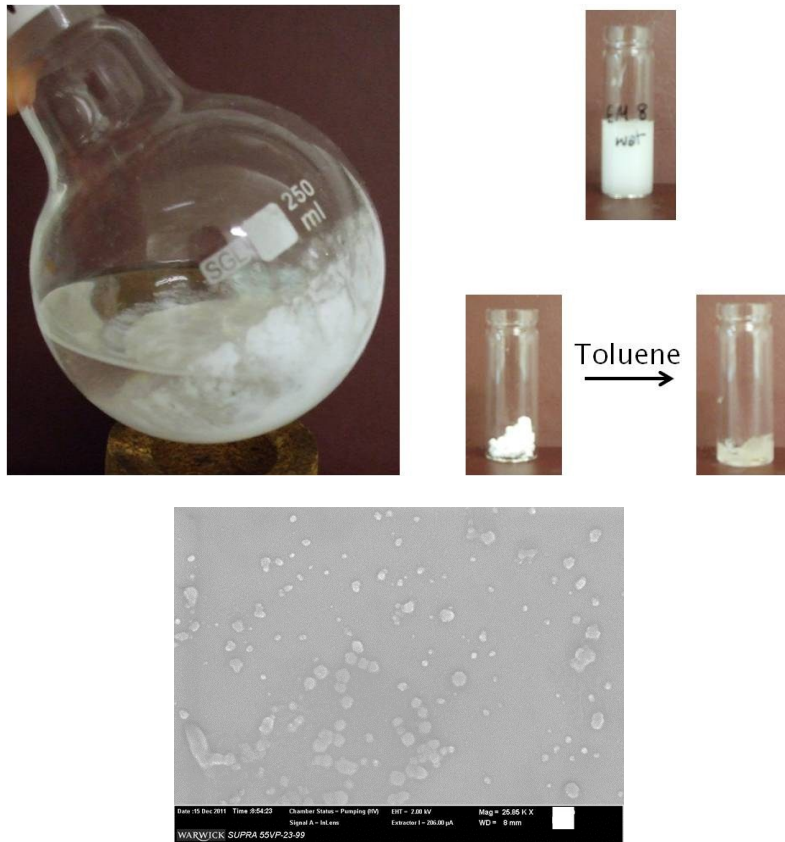

**S3 - Overview of conditions used for dispersion polymerisations.**

| Sample # | Conditions    |                           |                  |                                   |                  |                           | Observations<br>Particle size (nm)<br><i>DLS, SEM</i>     |
|----------|---------------|---------------------------|------------------|-----------------------------------|------------------|---------------------------|-----------------------------------------------------------|
|          | Monomer (wt%) | Crosslinker (wt% wrt mon) | Surfactant (wt%) | Solvent                           | Initiator (wt%)  | Reaction temperature (°C) |                                                           |
| DISP 1   | DMAPS (5)     | MBAc (0.5)                | TWEEN 80 (1)     | H <sub>2</sub> O                  | V50 (0.04)       | 50                        | Aggregation                                               |
| DISP 2   | DMAPS (5)     | MBAc (0.5)                | TWEEN 80 (2)     | H <sub>2</sub> O                  | V50 (0.04)       | 50                        | Aggregation                                               |
| DISP 3   | DMAPS (1)     | MBAc (0.5)                | TWEEN 80 (0.2)   | H <sub>2</sub> O                  | V50 (0.008)      | 50                        | Less aggregation occurs<br><i>erratic data, 500-900nm</i> |
| DISP 4   | DMAPS (1)     | MBAc (2)                  | PEGMA (0.2)      | H <sub>2</sub> O                  | V50 (0.008)      | 50                        | Clear solution                                            |
| DISP 5   | DMAPS (1)     | MBAc (2)                  | TWEEN 80 (0.2)   | H <sub>2</sub> O                  | V50 (0.008)      | 50                        | Aggregation                                               |
| DISP 7   | DMAPS (2)     | MBAc (2)                  | SDS (0.04)       | H <sub>2</sub> O                  | KPS (0.02)       | 65                        |                                                           |
| DISP 8   | DMAPS (2)     | MBAc (2)                  | SDS (0.04)       | H <sub>2</sub> O                  | KPS/TEMED (0.02) | 25                        | Aggregation                                               |
| DISP 9   | DMAPS (1)     | EGDMA (2)                 | TWEEN 80 (0.2)   | H <sub>2</sub> O                  | V50 (0.008)      | 50                        | Clear solution                                            |
| DISP 10  | DMAPS (1)     | MBAc (0.5)                | TWEEN 80 (0.2)   | 80% H <sub>2</sub> O,<br>20% MeOH | V50 (0.008)      | 50                        | Aggregation                                               |
| DISP 11  | DMAPS (2)     | MBAc (2)                  | SDS (0.04)       | 80% H <sub>2</sub> O,<br>20% MeOH | KPS/TEMED (0.02) | 25                        | Aggregation                                               |
| DISP 12  | DMAPS (1)     | MBAc (2)                  | PEGMA (0.02)     | H <sub>2</sub> O                  | KPS/TEMED (0.02) | 25                        | Aggregation                                               |
| DISP 13  | DMAPS (1)     | MBAc (2)                  | TWEEN 80 (0.2)   | 95% H <sub>2</sub> O,<br>5% MeOH  | KPS/TEMED (0.02) | 25                        | Aggregation                                               |
| DISP 14  | DMAPS (2)     | MBAc (2)                  | SDS (0.04)       | H <sub>2</sub> O                  | KPS/TEMED (0.02) | 4                         | Aggregation                                               |

**S4 – Image of water swollen gel formed when s... ion system was attempted showing issues with**

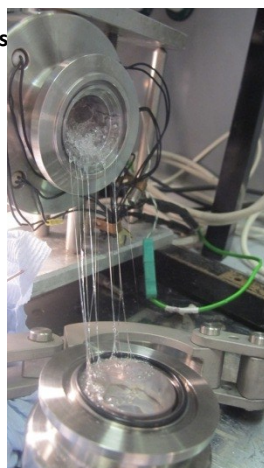

S5 – Image of redispersions of particles with varying crosslinker densities (left to right) – 6 (10 wt%), 5 (5 wt%), 4 (2.5 wt%), 3 (1 wt%), 2 (0.5 wt%).

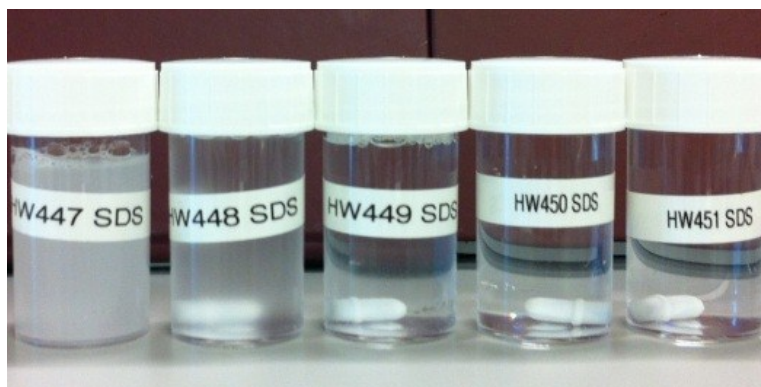

S6 – SEM images of particles formed with 10wt% MBAc (left) and PEGDMA (right) as crosslinker in the place of EGDMA.

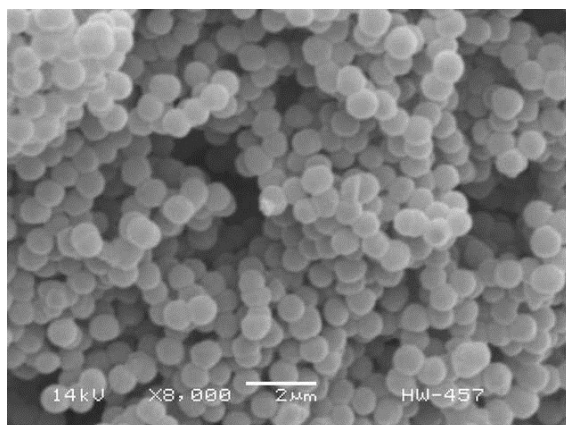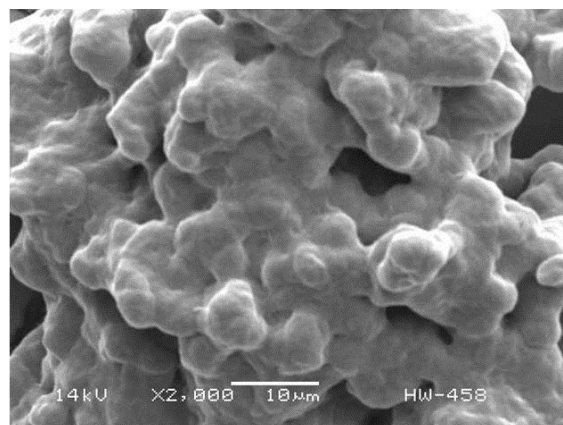

S7 - Effect of varying the concentration of initiator in the polymerisation of DMAPS in scCO<sub>2</sub>.

| Sample   | AIBN / wt% <sup>b</sup> | Obtained Yield / g <sup>c</sup> | Morphology <sup>d</sup>               |
|----------|-------------------------|---------------------------------|---------------------------------------|
| Init 1   | 1                       | 93                              | Highly agglomerated microparticles    |
| Init 2.5 | 2.5                     | 94                              | Well defined spherical microparticles |
| Init 5   | 5                       | 84                              | Well defined spherical particles      |
| Init 10  | 10                      | 87                              | Highly agglomerated microparticles    |

<sup>a</sup> Reactions performed with DMAPS (2 g), EGDMA (190 μL, 10 wt% with respect to monomer), 4.5 mL methanol in a 60 mL autoclave at 65 °C and 27.6 MPa for 2 h, followed by supercritical fluid extraction of methanol at 45 °C and 27.6 MPa; <sup>b</sup> Initiator concentration with respect to monomer; <sup>c</sup> Yield determined gravimetrically after drying *in vacuo*; <sup>d</sup> Determined by SEM

S8 - Effect of varying the concentration of initiator in the polymerisation of DMAPS in scCO<sub>2</sub>.

1 wt% AIBN

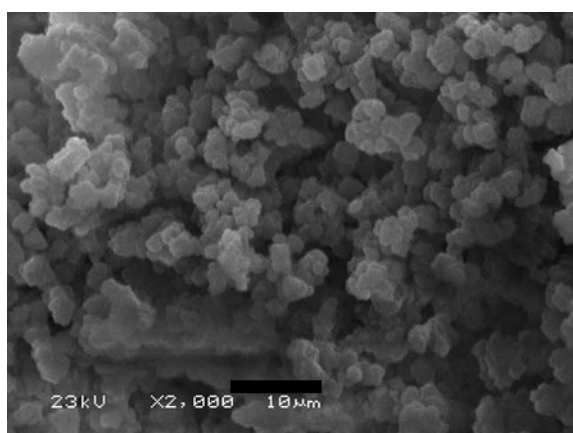

2.5 wt% AIBN

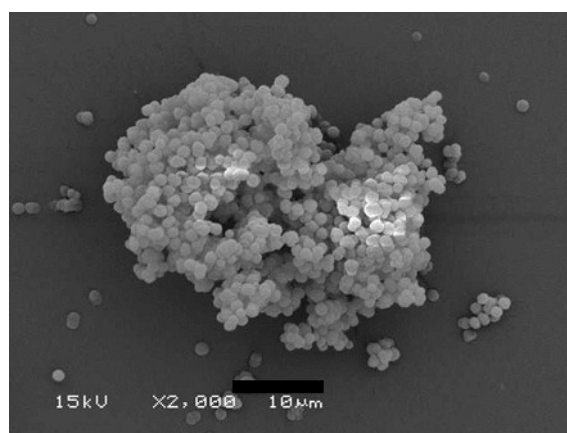

5 wt% AIBN

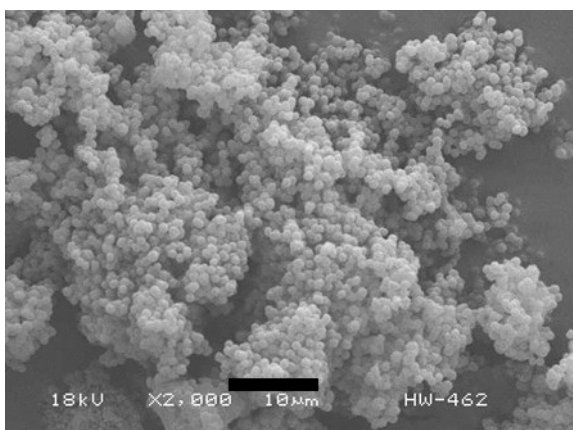

10 wt% AIBN

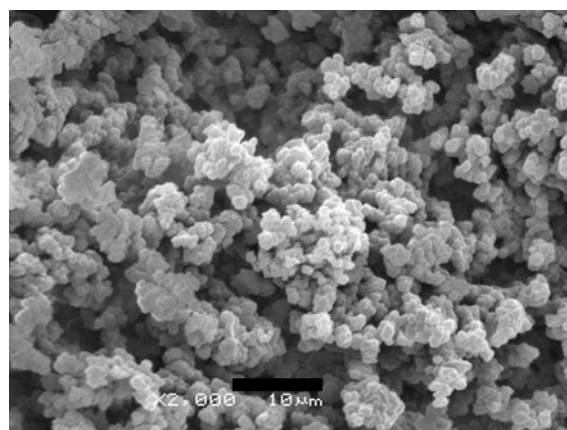

S9 – Broad PSD of Sample 11 dispersed in water with SDS,  $d(0.5)_{\text{volume}} = 2.85 \mu\text{m}$ .

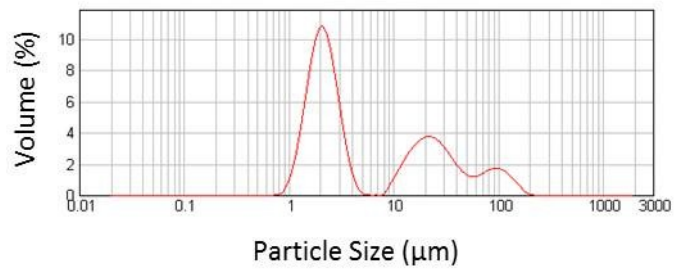

S10 - SEM images of cast film of particles, sample 6 – Table 1 (scale bar 20 μm left, 1 μm right).

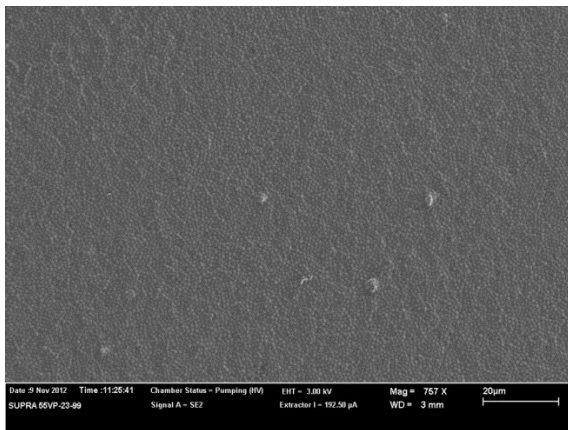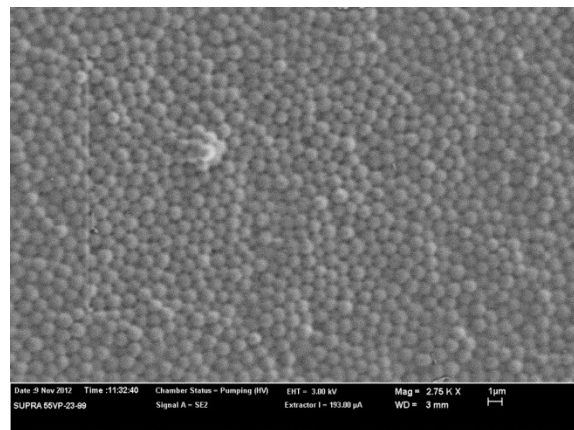

Supplement: c7py00455a1.pdf [file c7py00455a1.pdf]
